# Supplementary material
Source: HighWire-hosted journal article supplement (doi:10.1101/rna.080176.124)
Supplement: Supplemental_Figures.docx [file Supplemental_Figures.docx]

Supplementary Materials for:

**Unraveling Unbreakable Hairpins: Characterizing RNA secondary structures that are persistent after dinucleotide shuffling**

Alyssa A Pratt1,2, David A Hendrix1,2,*

1 Department of Biochemistry and Biophysics, Oregon State University, Corvallis Oregon

2 School of Electrical Engineering and Computer Science, Oregon State University, Corvallis Oregon

* to whom correspondence should be addressed [david.hendrix@oregonstate.edu](mailto:david.hendrix@oregonstate.edu)


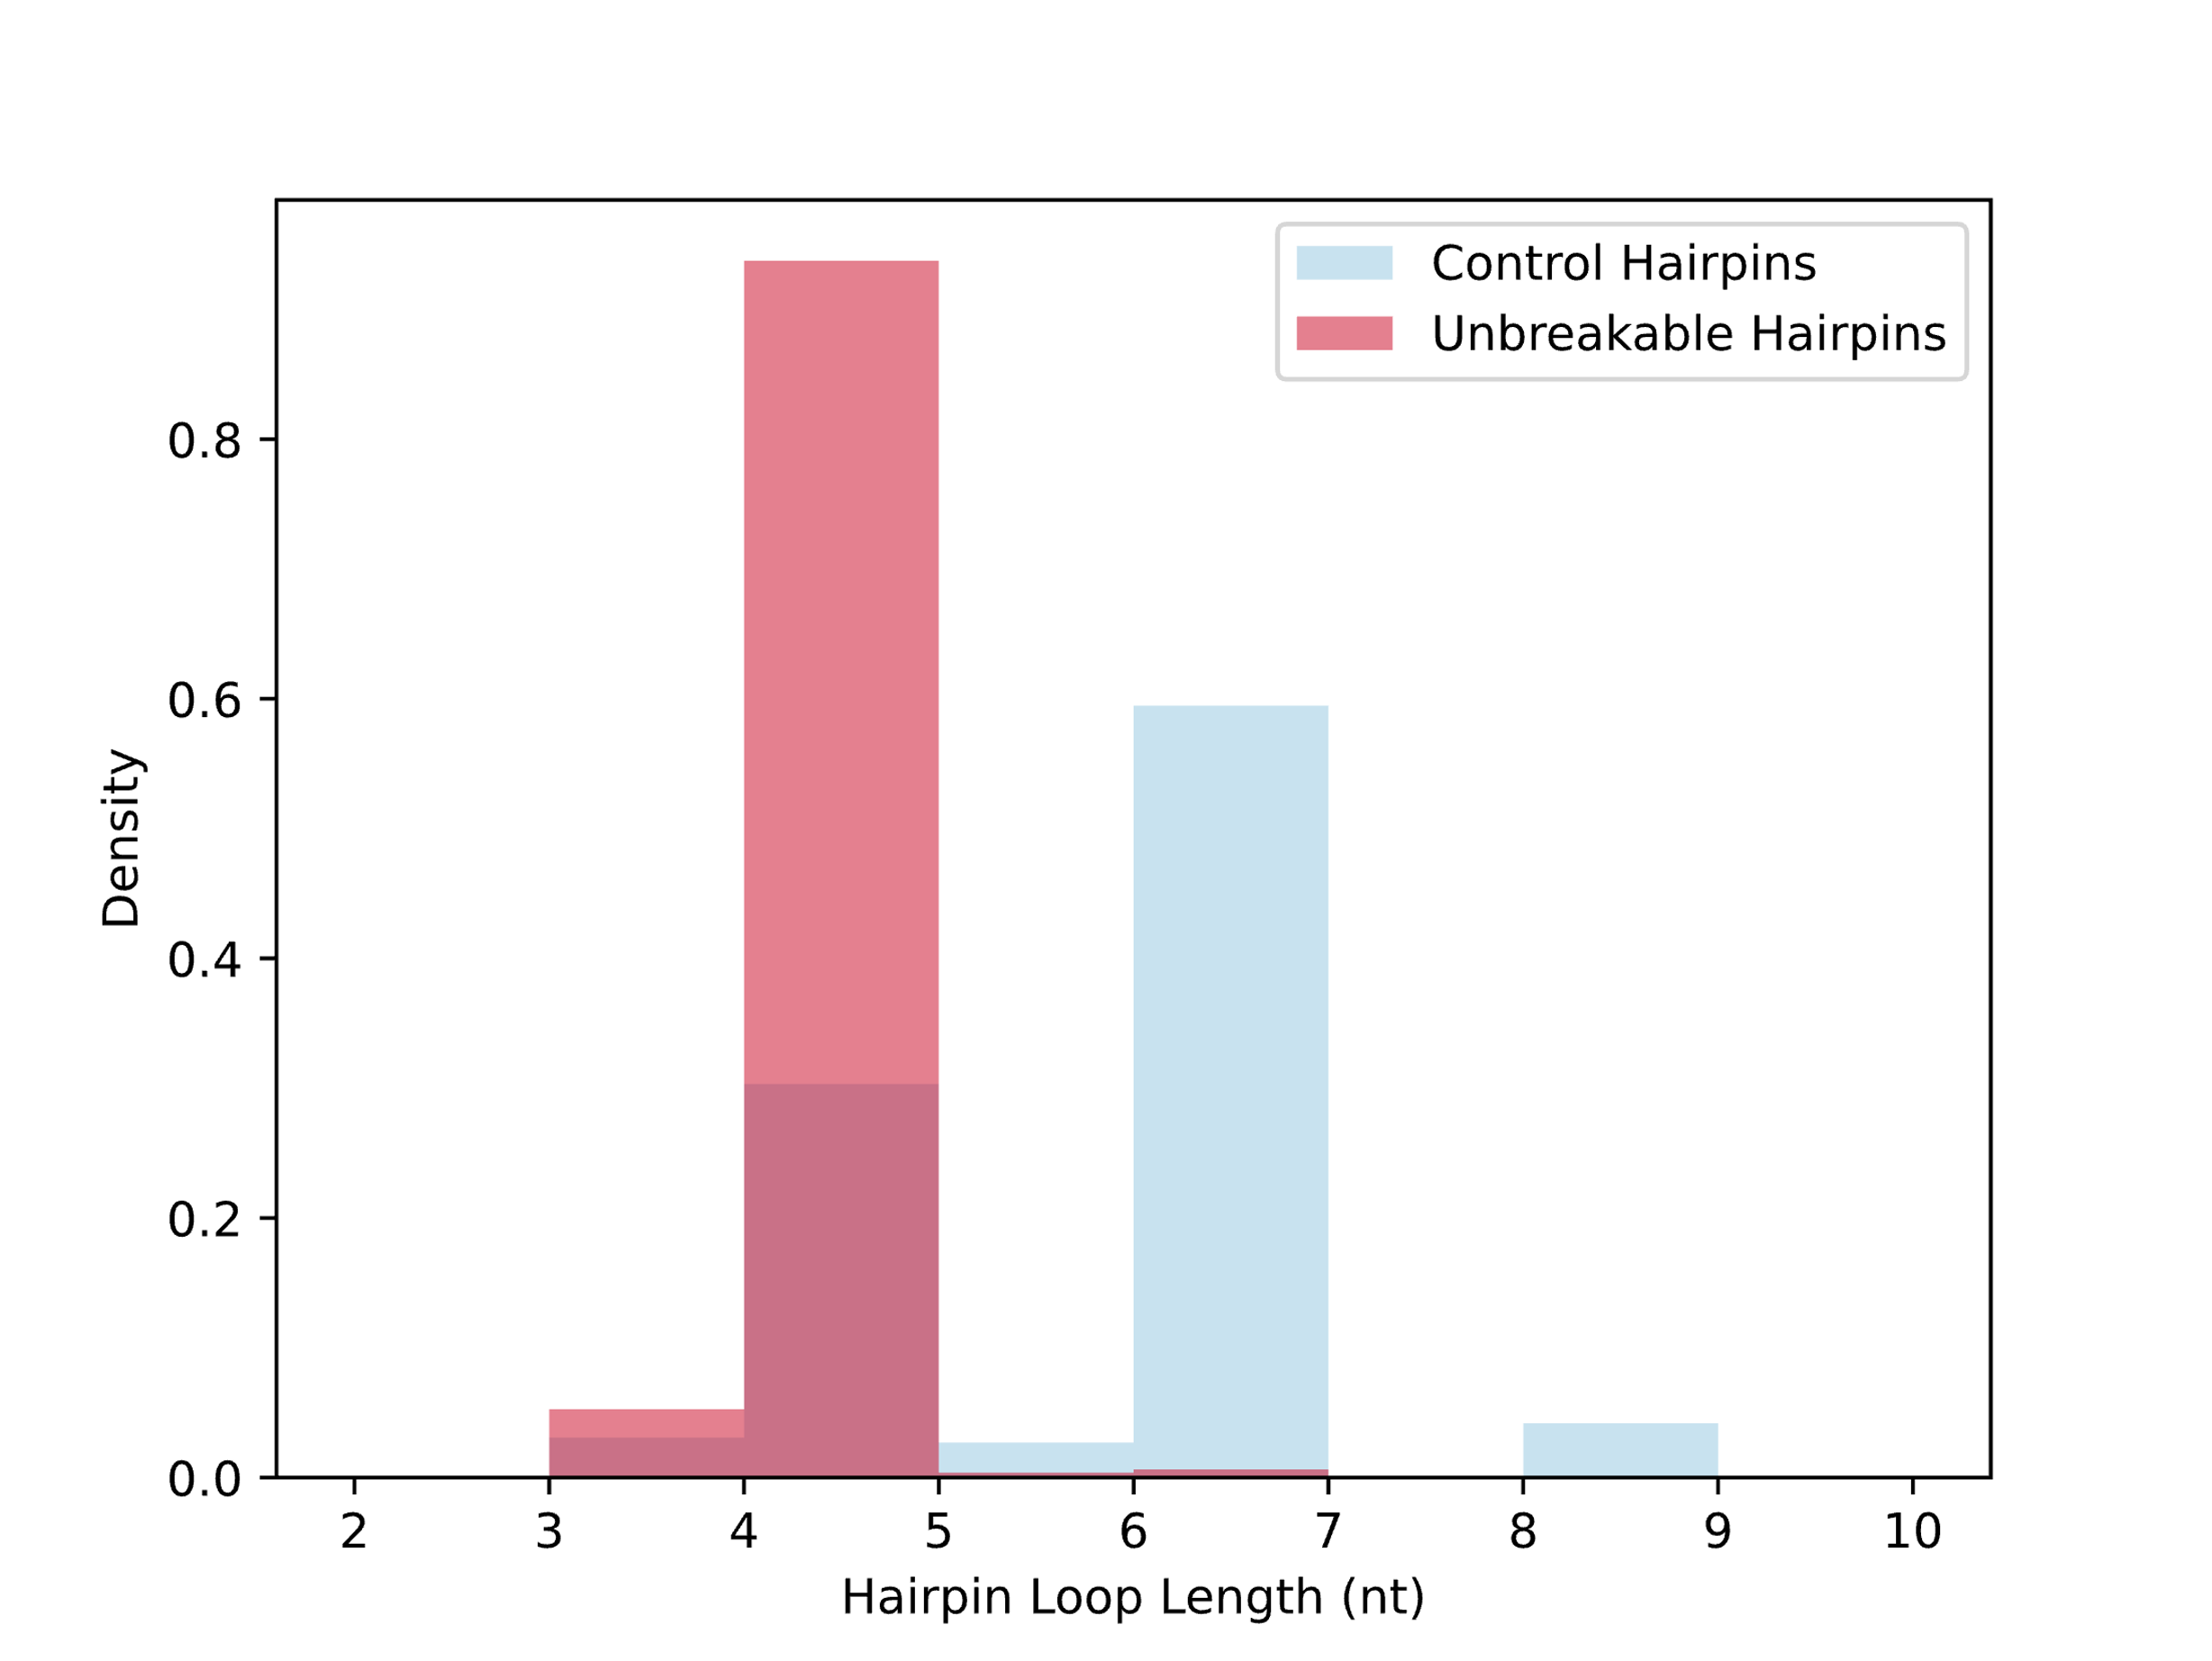


Supplementary Figure 1: Unbreakable are more likely to contain tetraloops than the length-matched representative sample of breakable hairpins. X-axis labels correspond to the lower bound of the 1-nt bin—for example the most frequent length of unbreakable hairpins is 4nt.


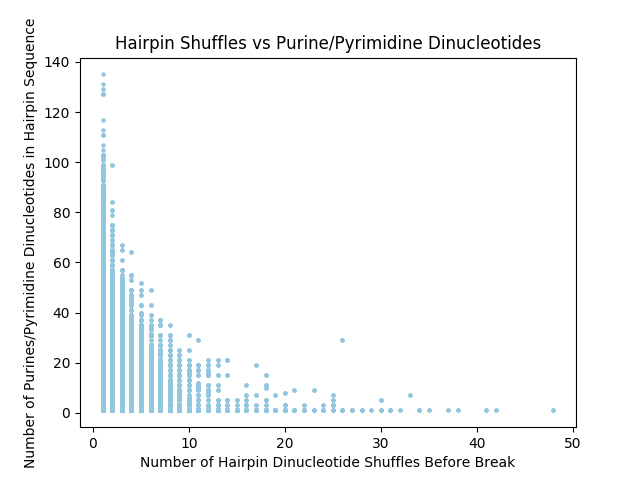


Supplementary Figure 2: The number of dinucleotide shuffles for each RNA hairpin until a “break”, resulting in a non-hairpin structure, has an inverse relationship with the number of purine/pyrimidine split dinucleotides. The outlier at around 27 shuffles corresponds to an unusually long unbreakable hairpin.


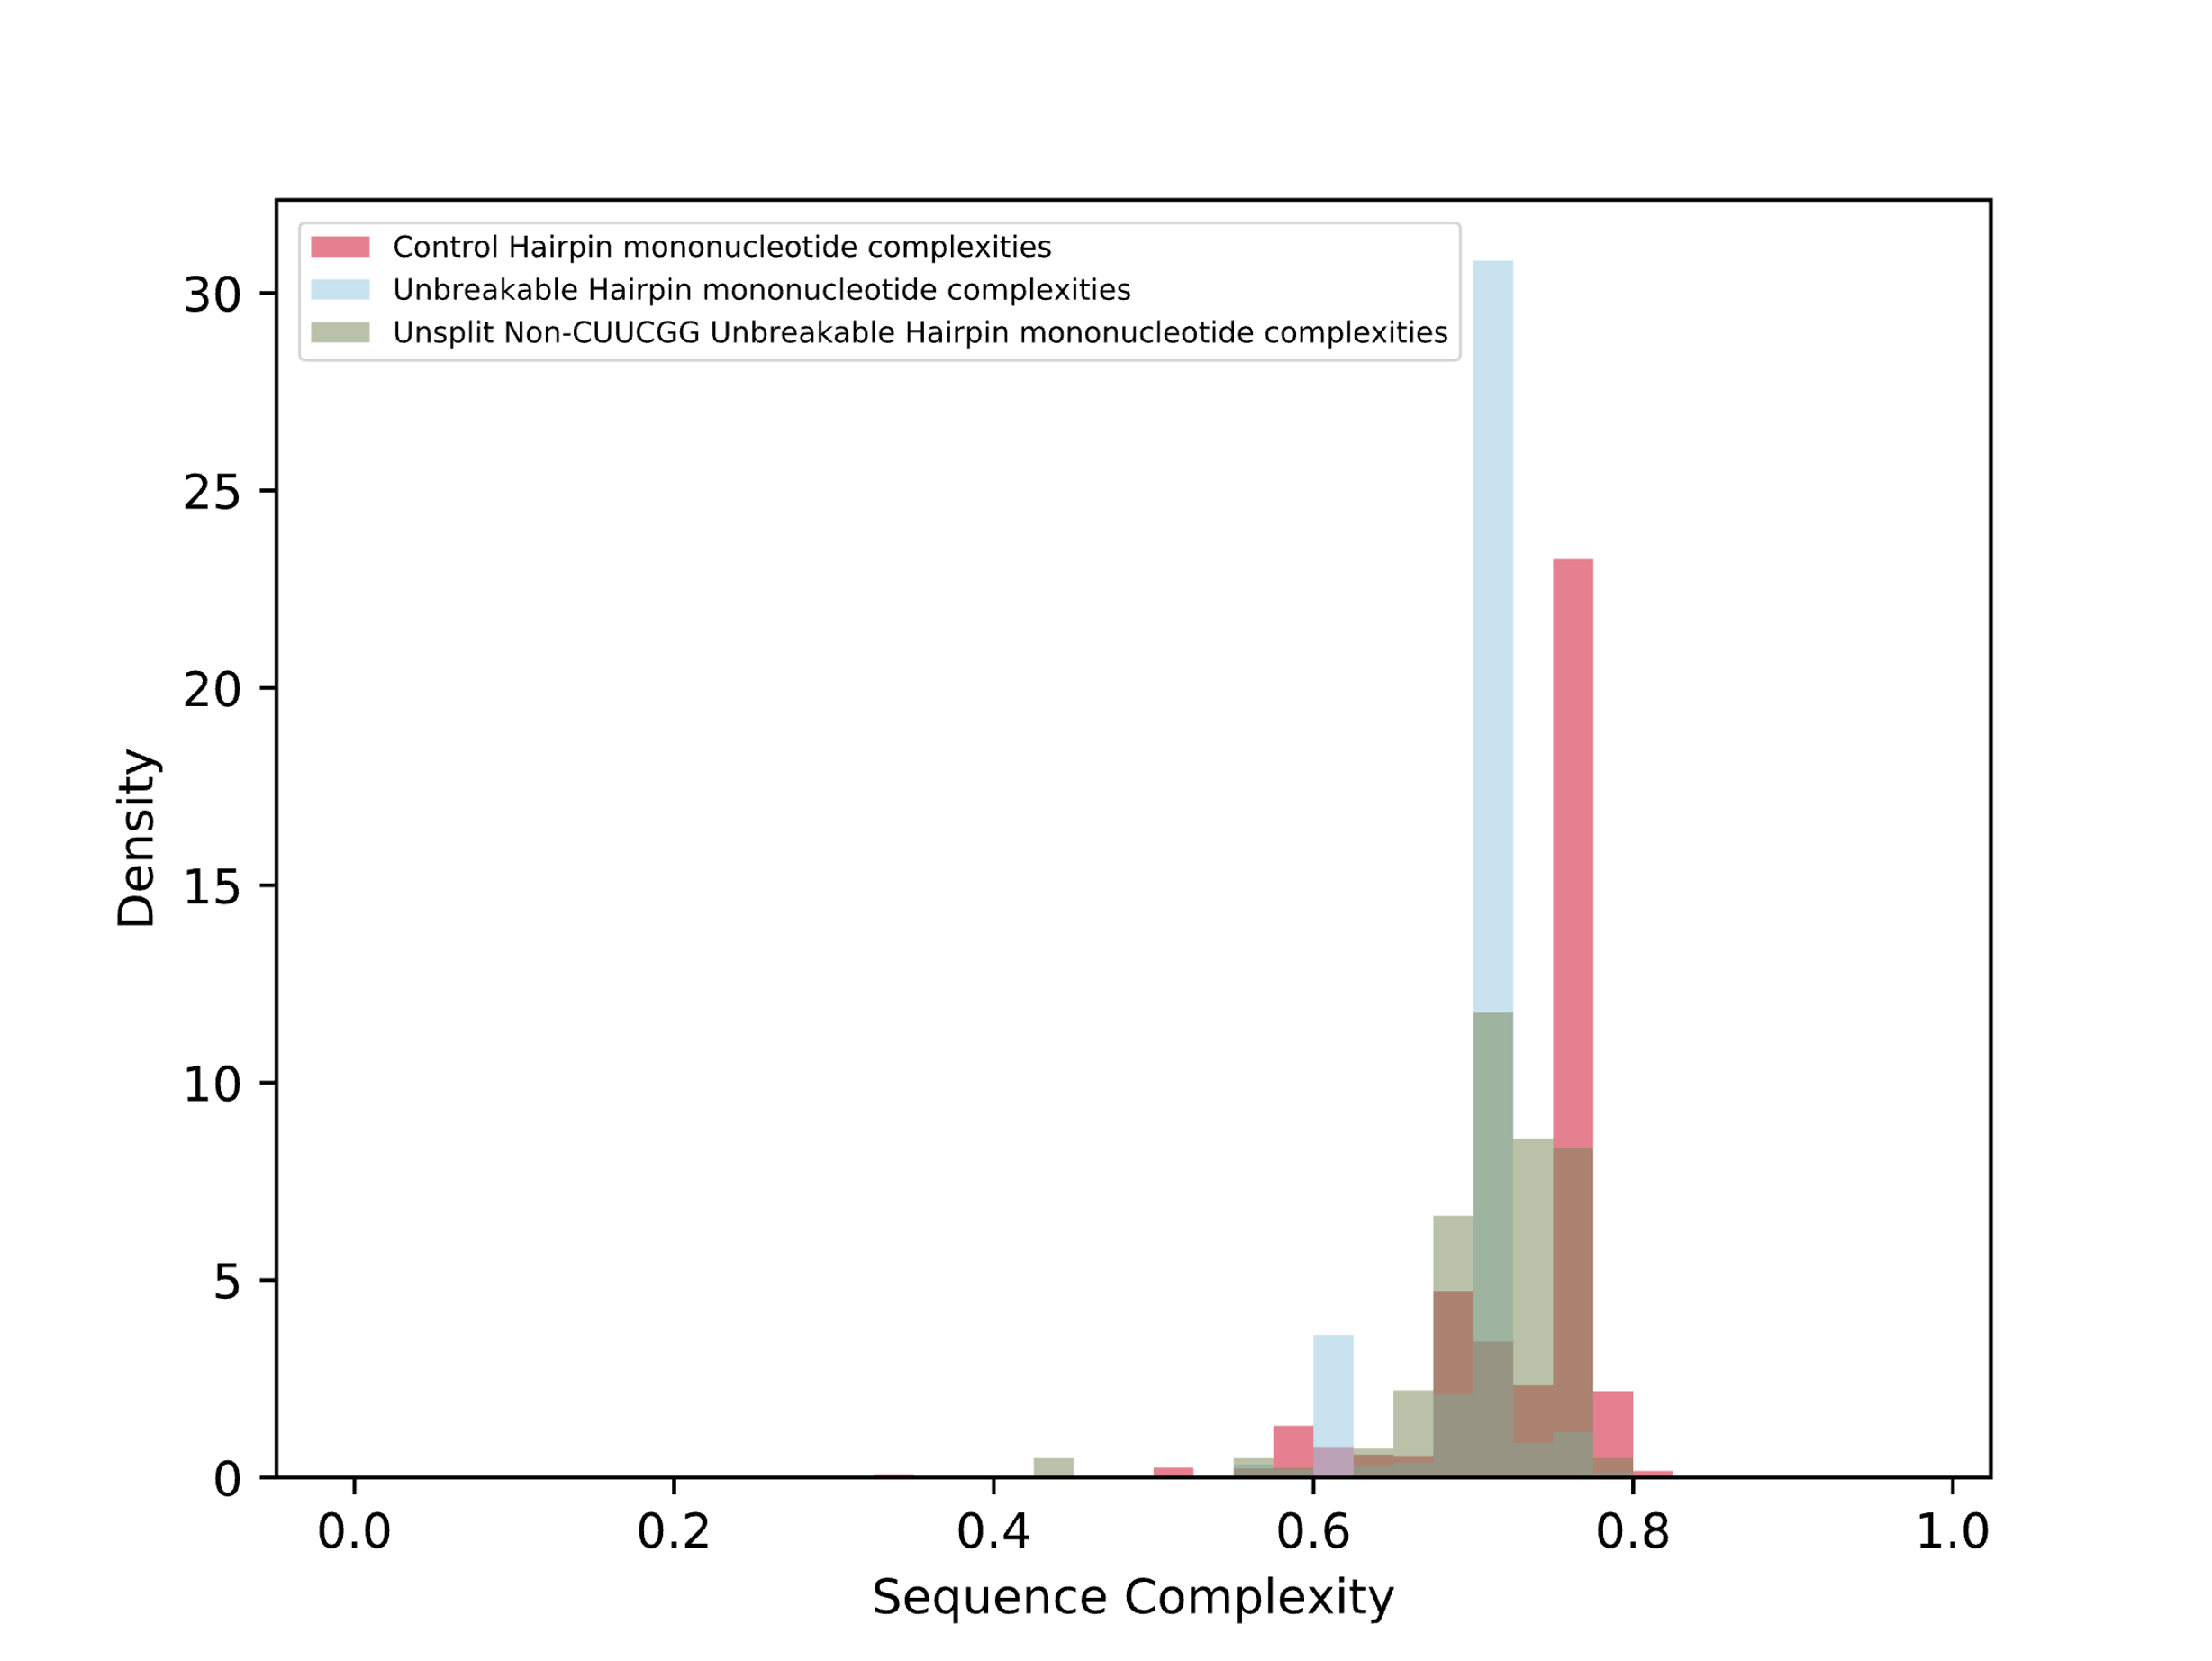
*Supplementary Figure 3*: Normalized histogram showing the empirical probability density of the sequence complexity of hairpins. The distributions vary between a representative set of control hairpins, unbreakable hairpins, and hairpins that lack two of the key features of the majority of unbreakable hairpins: a purine/pyrimidine split and C[UUCG]G tetraloop. On average, unbreakable hairpins have lower sequence complexity.


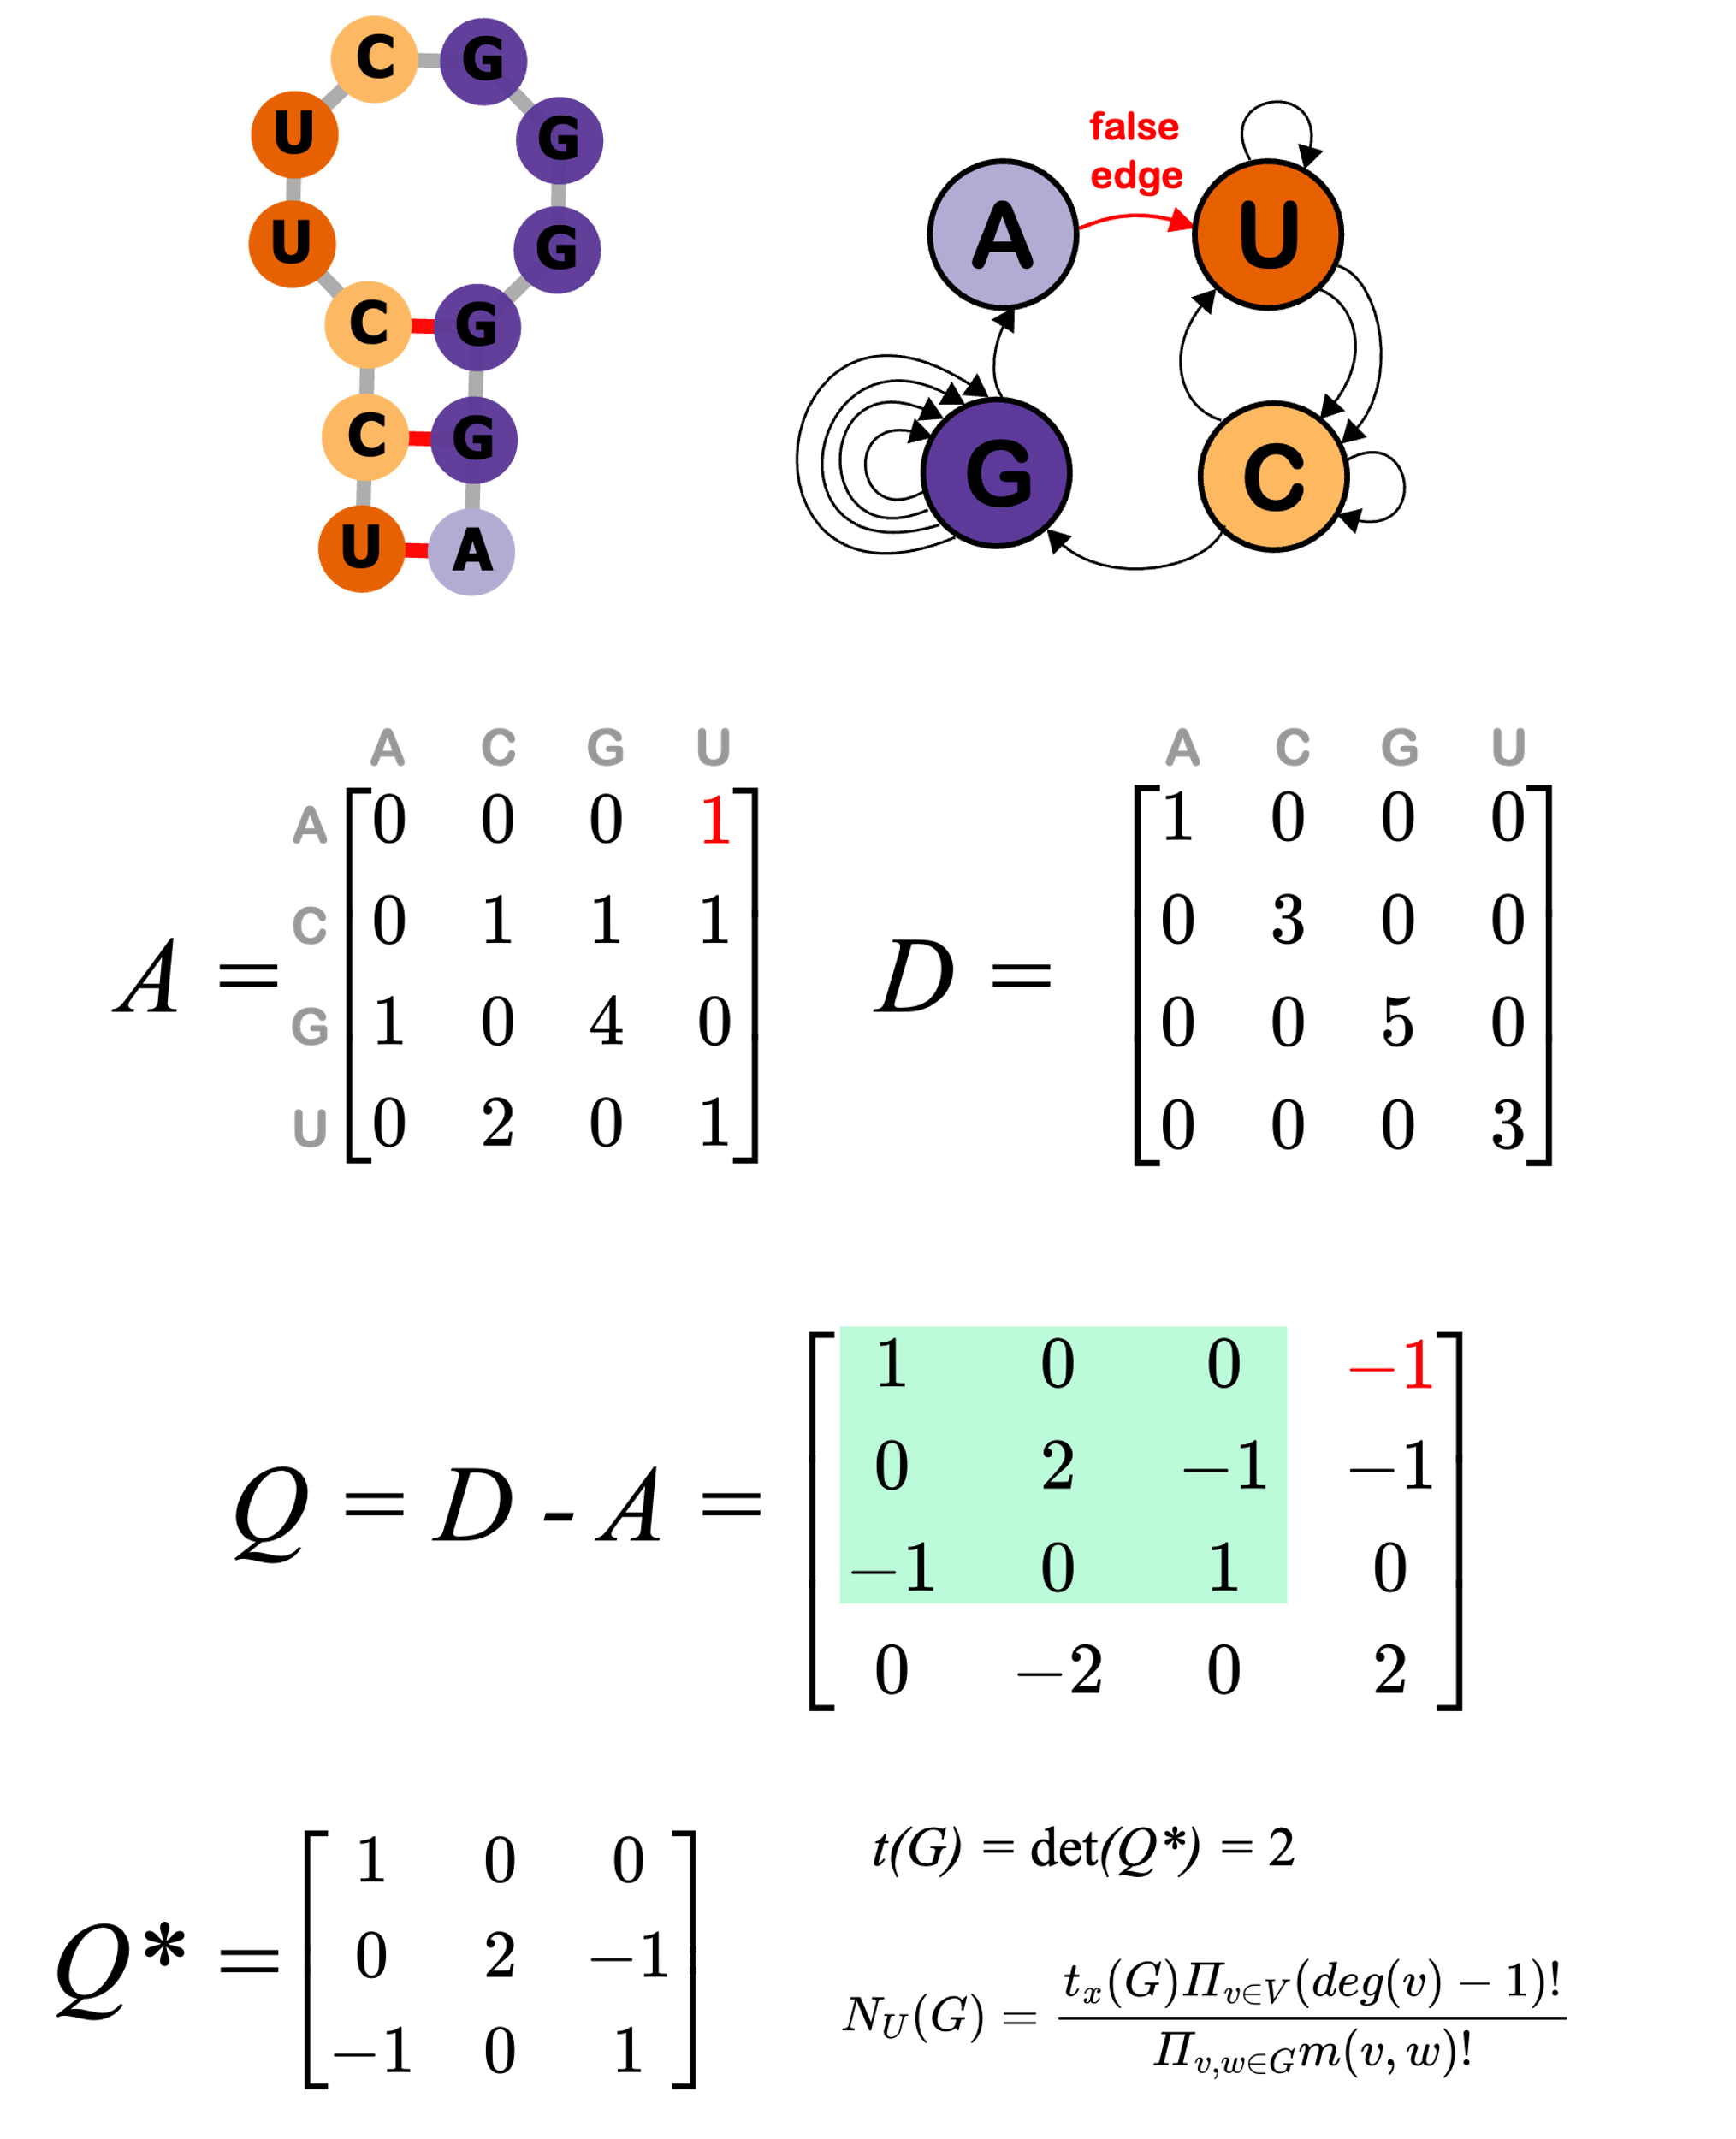


*Supplementary Figure 4:* The calculation of the number of unique sequences possible through dinucleotide shuffling. The matrix *A* corresponds to an adjacency matrix that includes the false. The matrix *D* is a diagonal matrix containing the in-degrees of each nucleotide vertex. The matrix Q is the difference of A and D, and Q* is reduced by removing the row and column where the path begins (the nucleotide that the false edge points to. The calculation of the determinant of the resultant *Q** produces a value that that can be used to calculate *.*


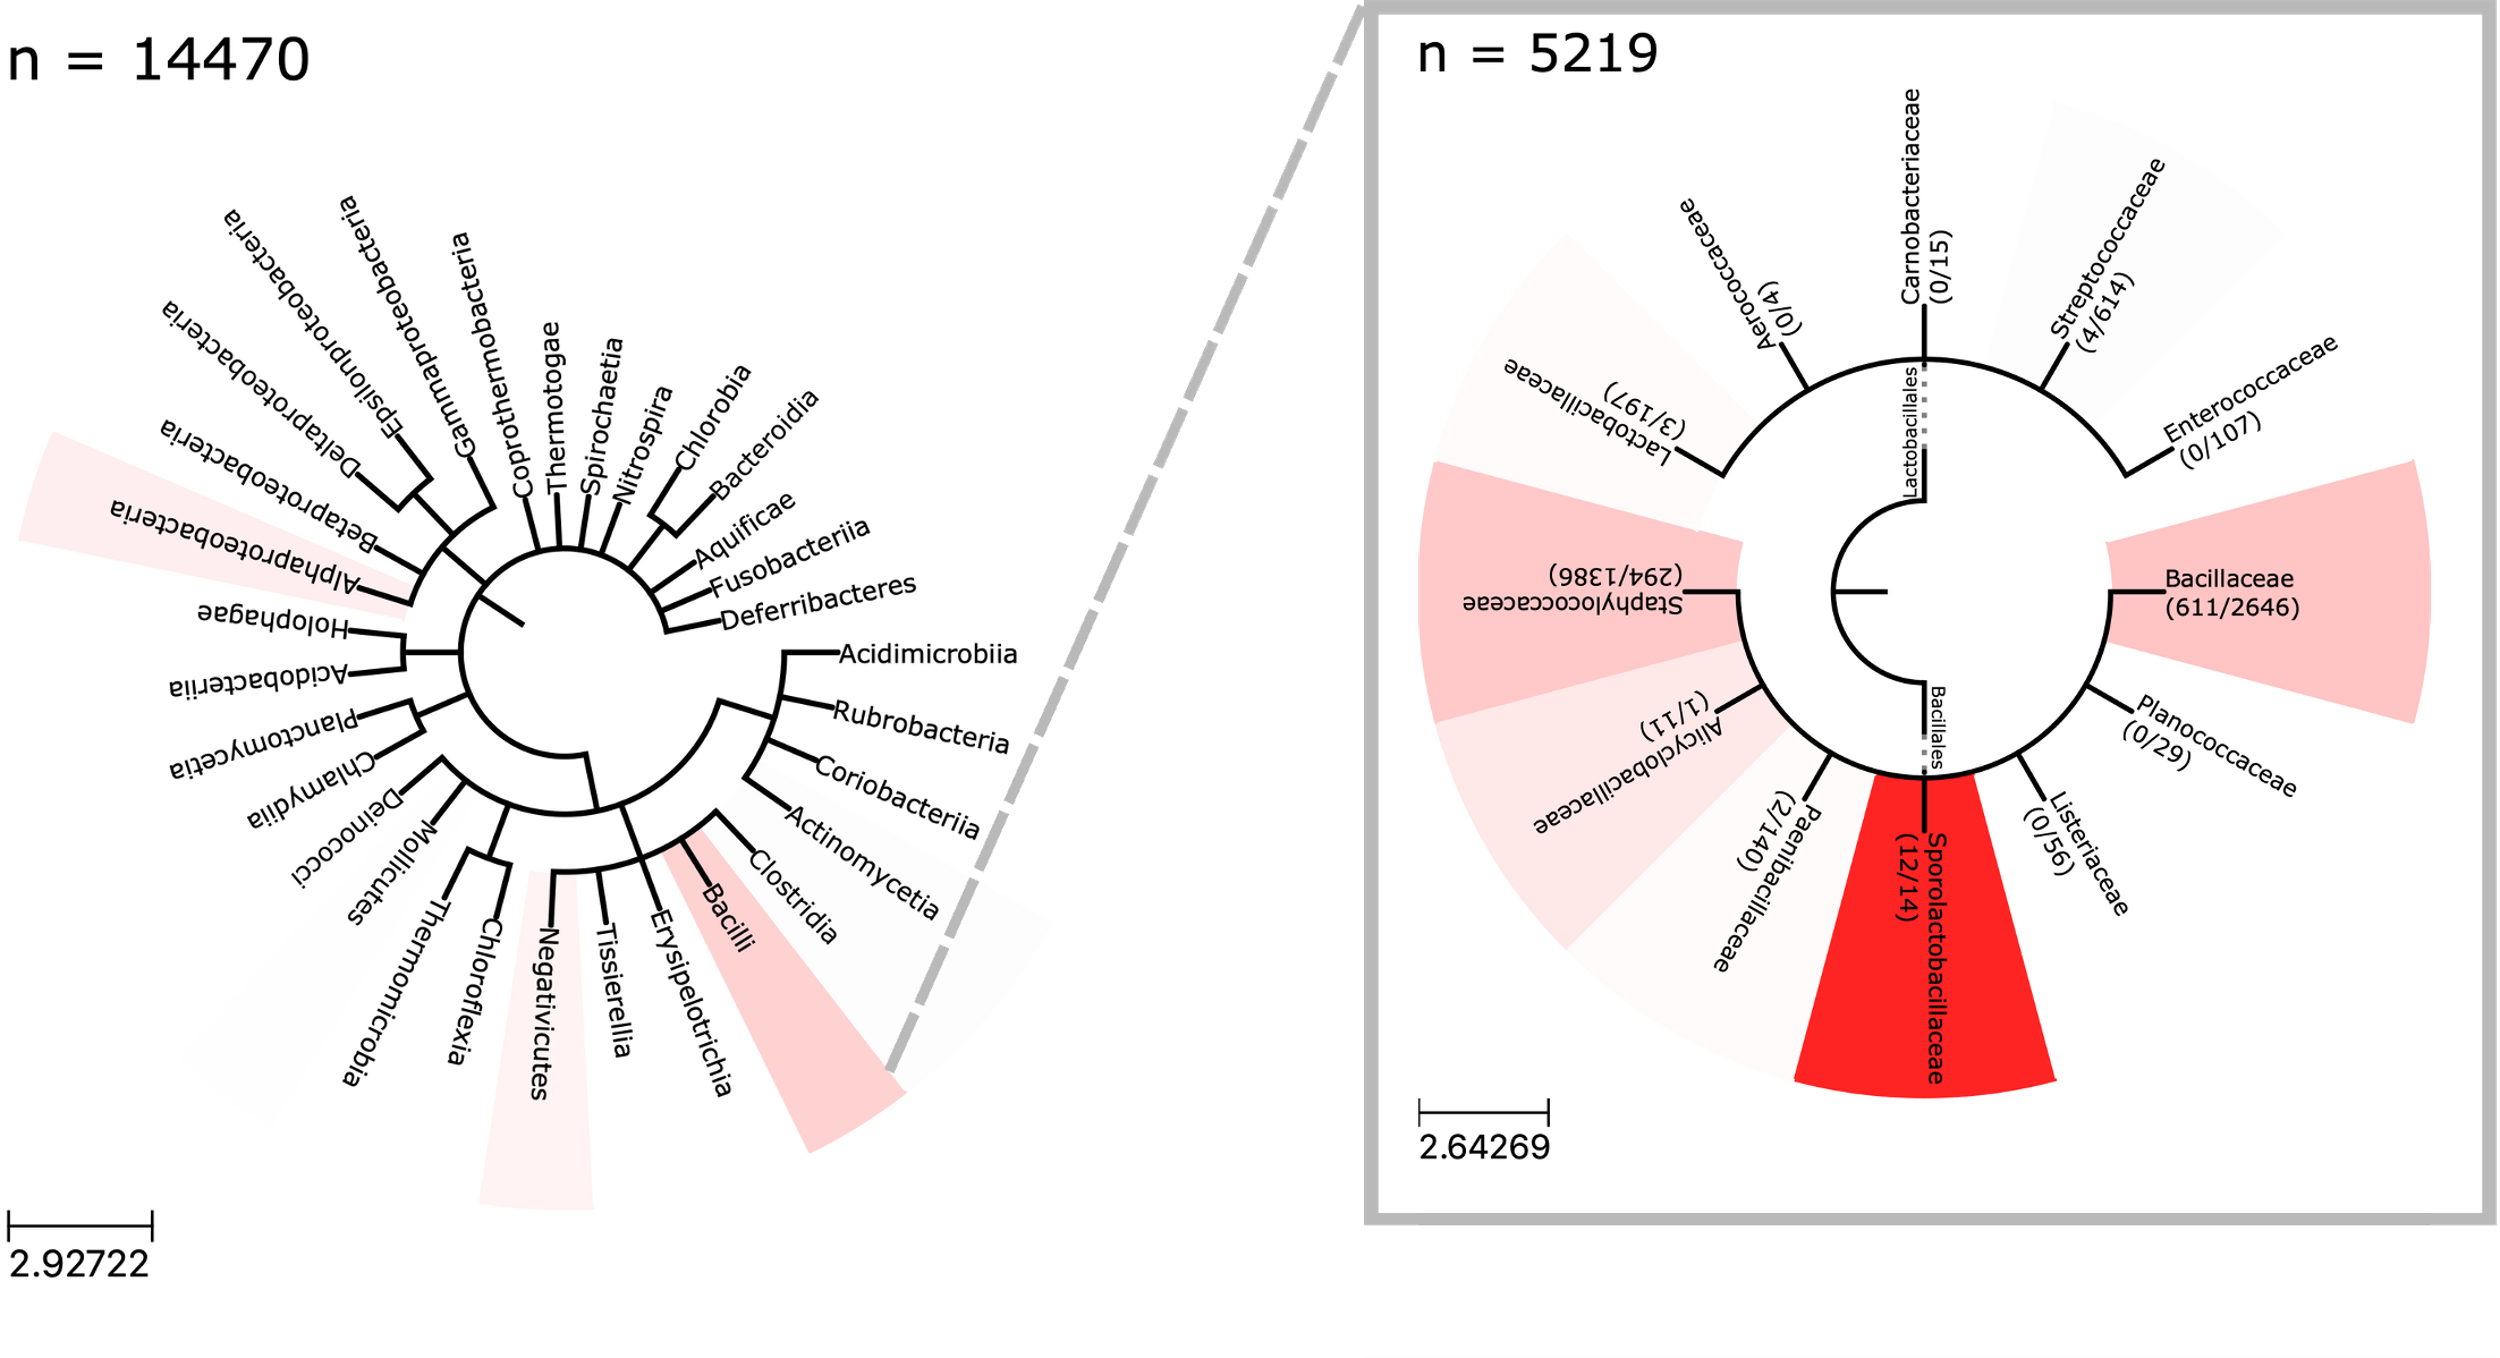


*Supplementary Figure* *5*: Phylogenetic distribution of unbreakable hairpins in Bacillales, with white representing no unbreakable hairpins in all sequenced 16S RNA and a complete saturation of red representing 100% of sequences containing unbreakable hairpins. Unbreakable hairpins appear to be enriched in 16S rRNA of Bacillales, particularly in endospore-forming orders. Scale bars correspond to branch length of the tree


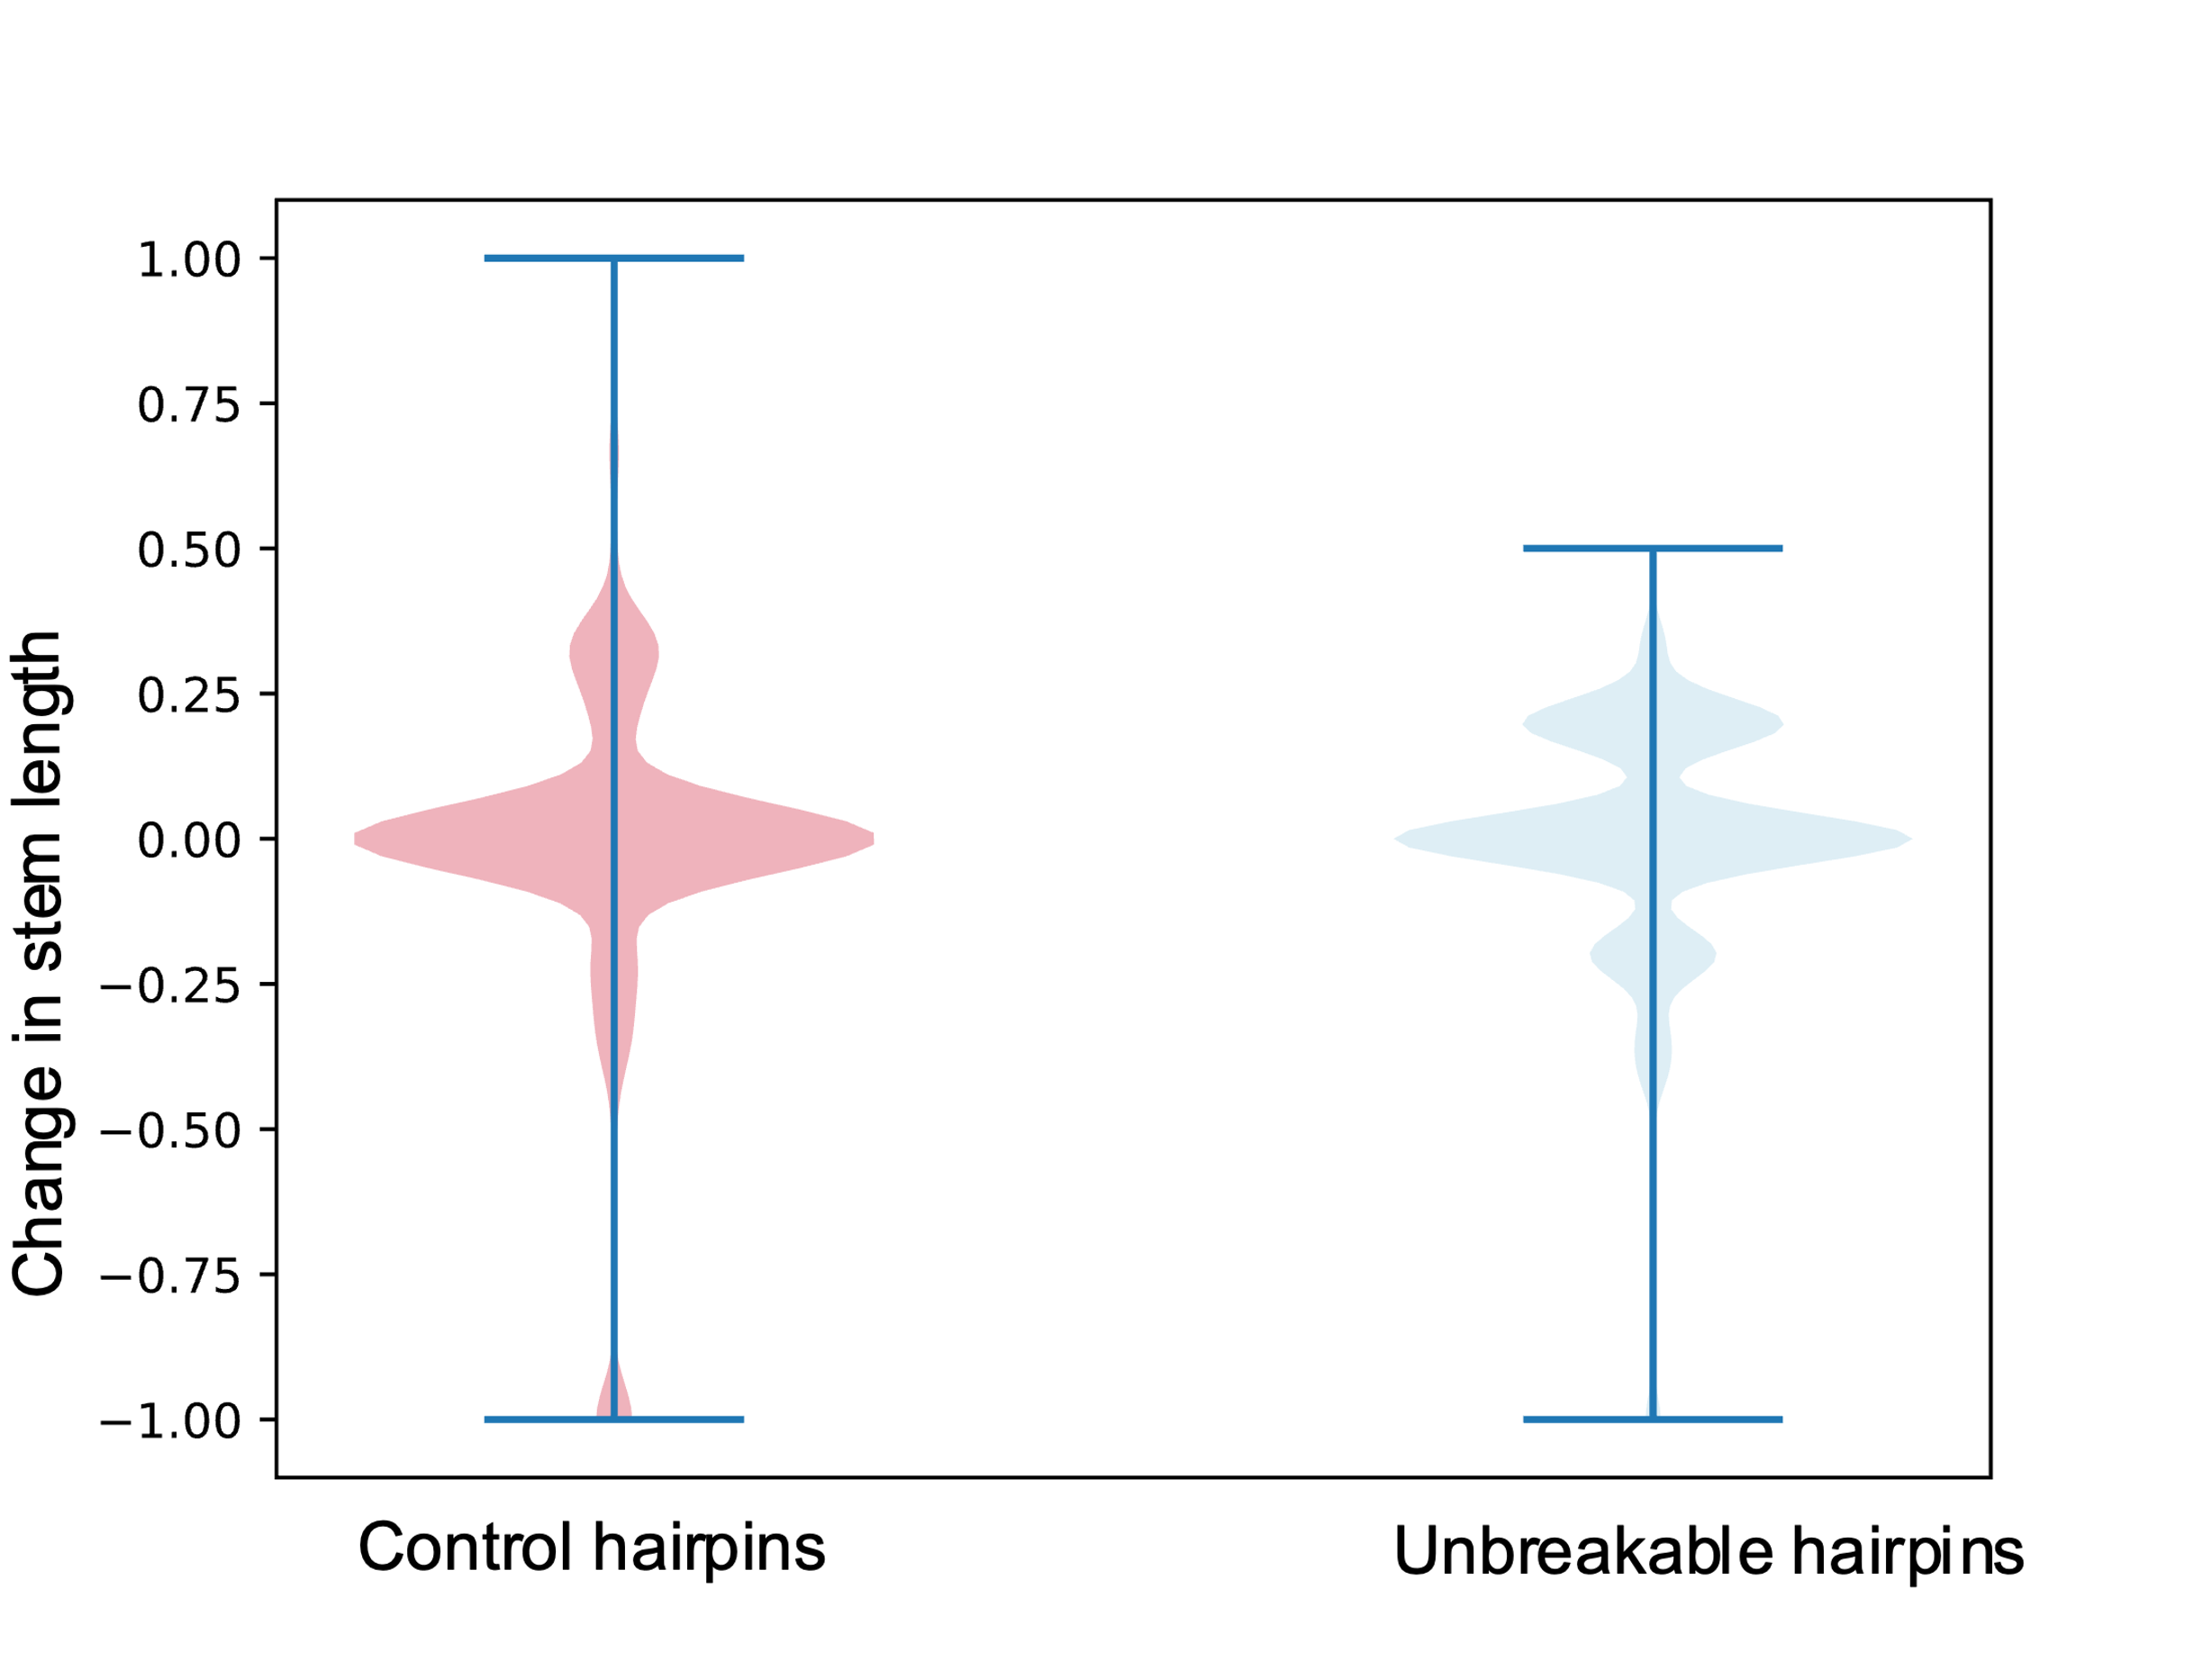


Supplementary Figure 6: Violin plots representing the relative change in stem length for unbreakable hairpins and control hairpins with the same length distribution after a single-nucleotide random insertion. A change of -1 represents a complete loss of hairpin structure.


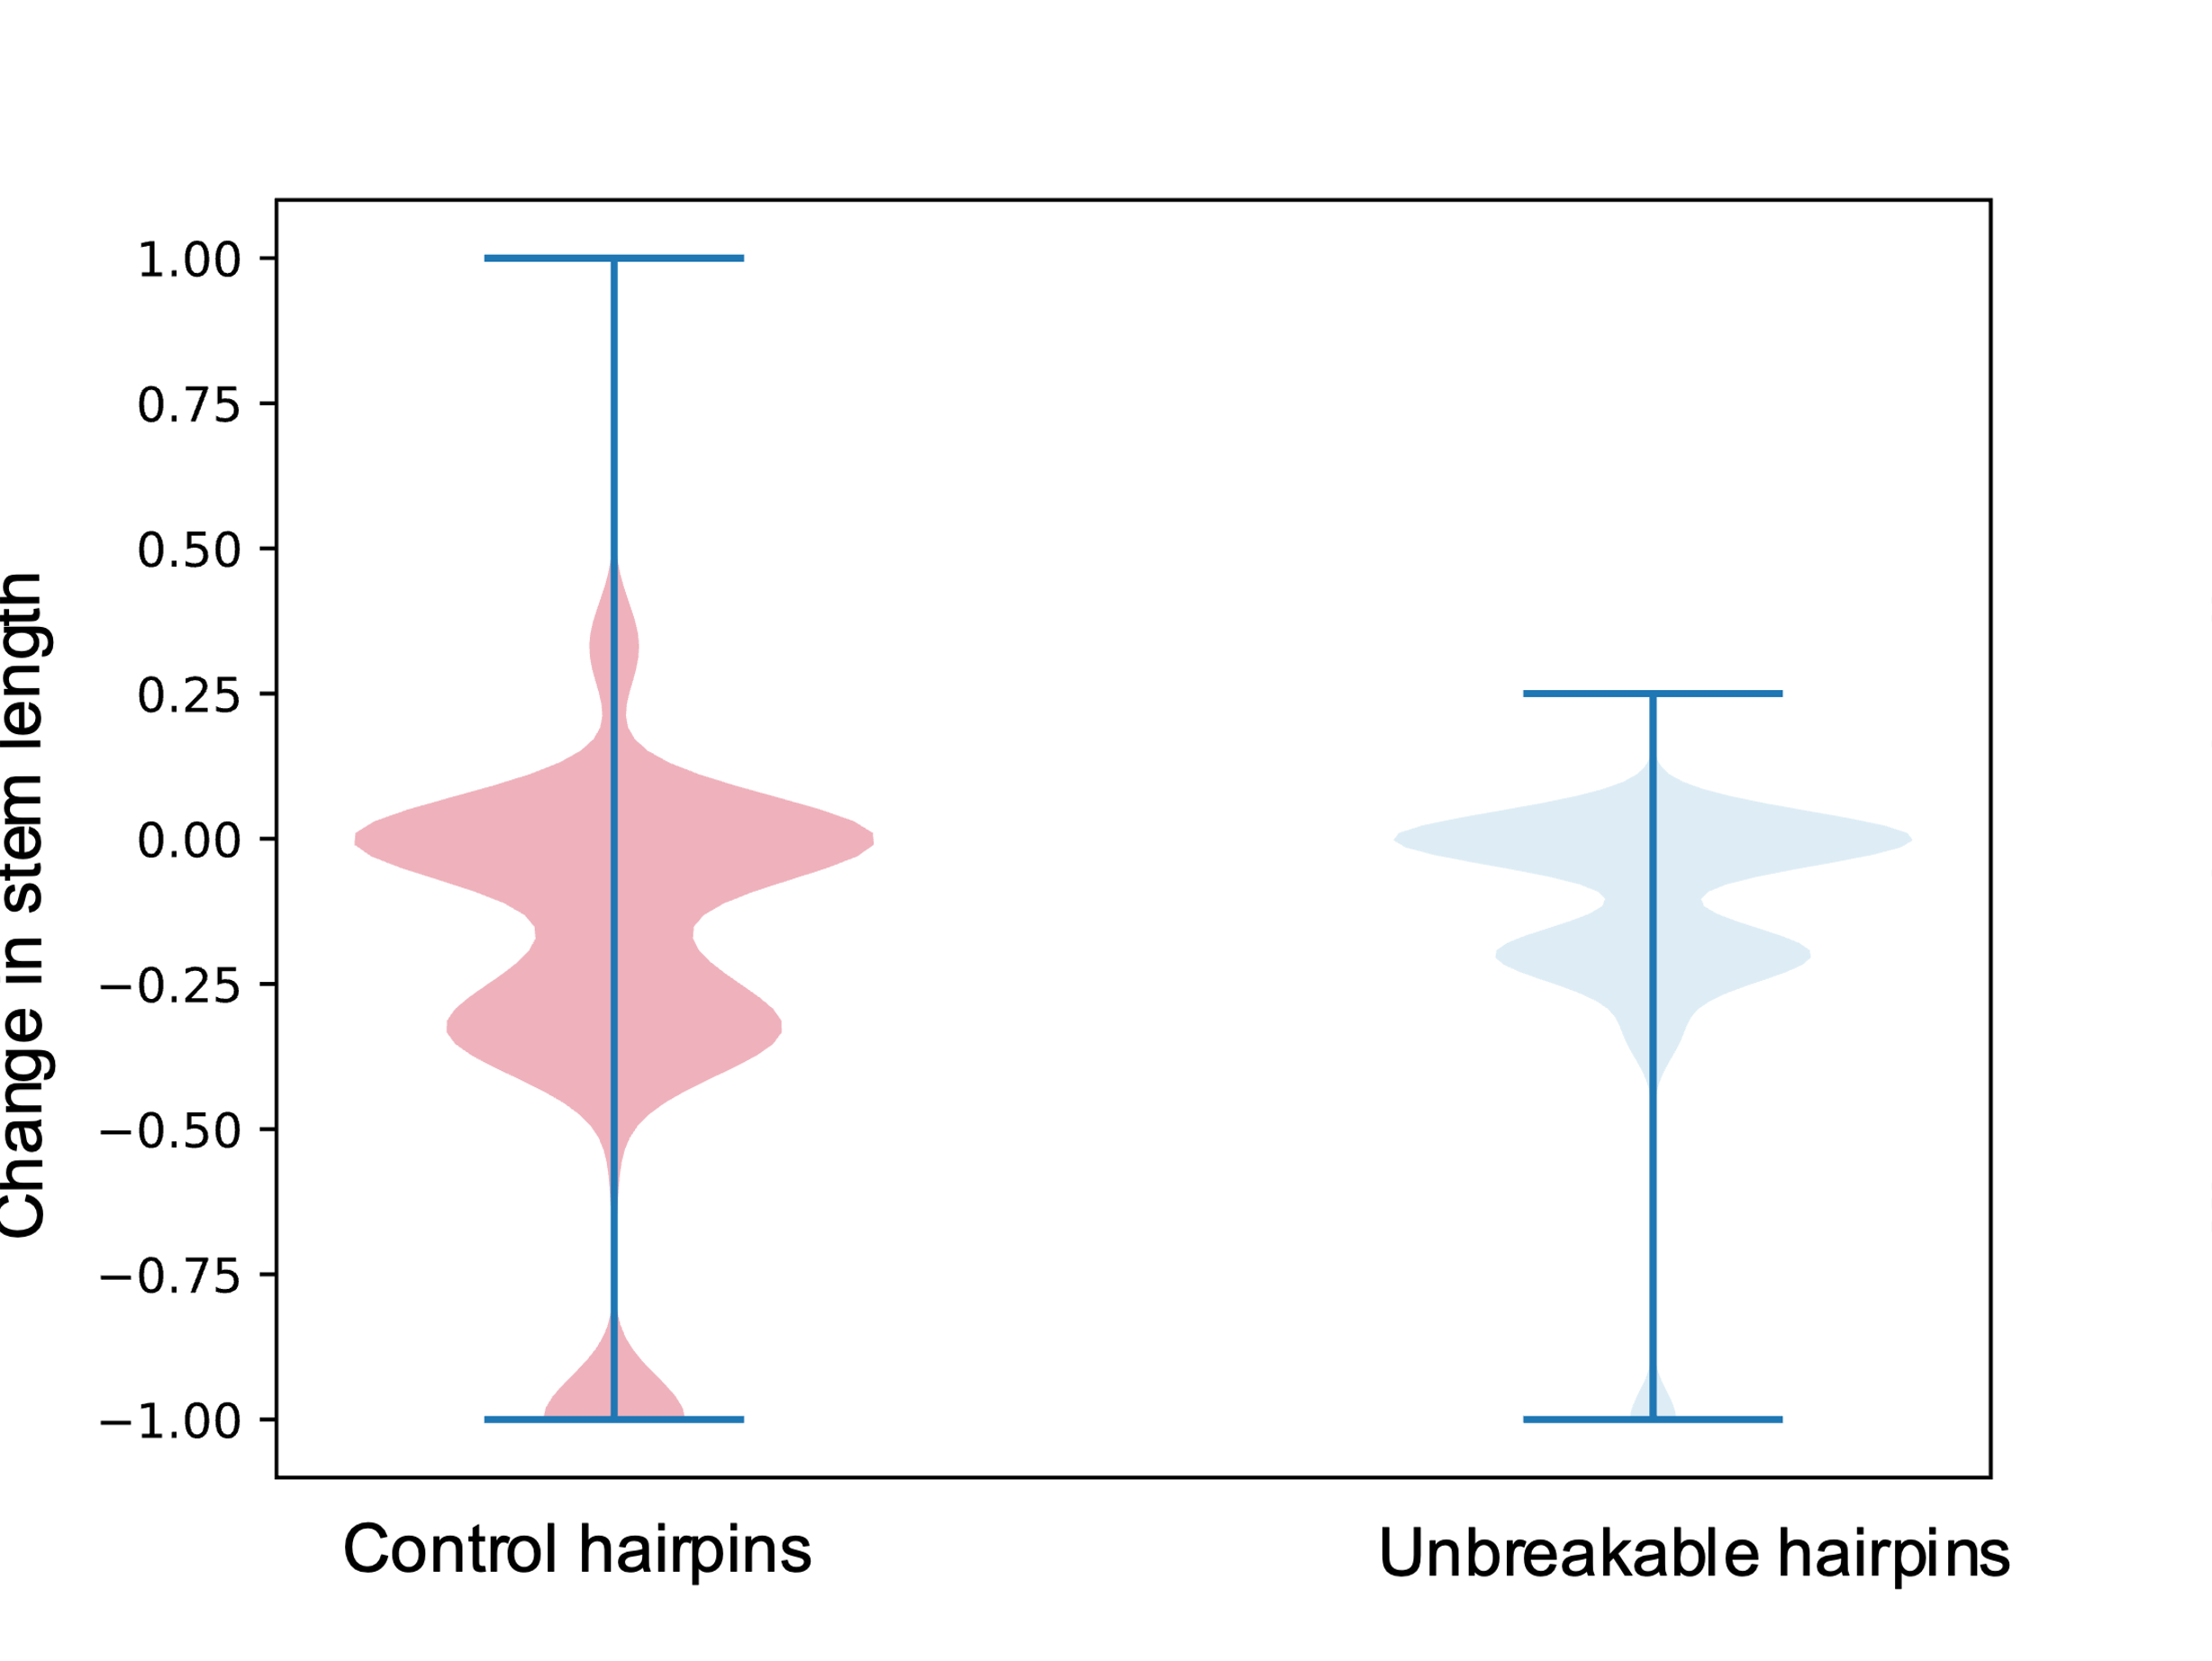


Supplementary Figure 7: Violin plots representing the relative change in stem length for unbreakable hairpins and control hairpins with the same length distribution after a single-nucleotide random deletion. A change of -1 represents a complete loss of hairpin structure.


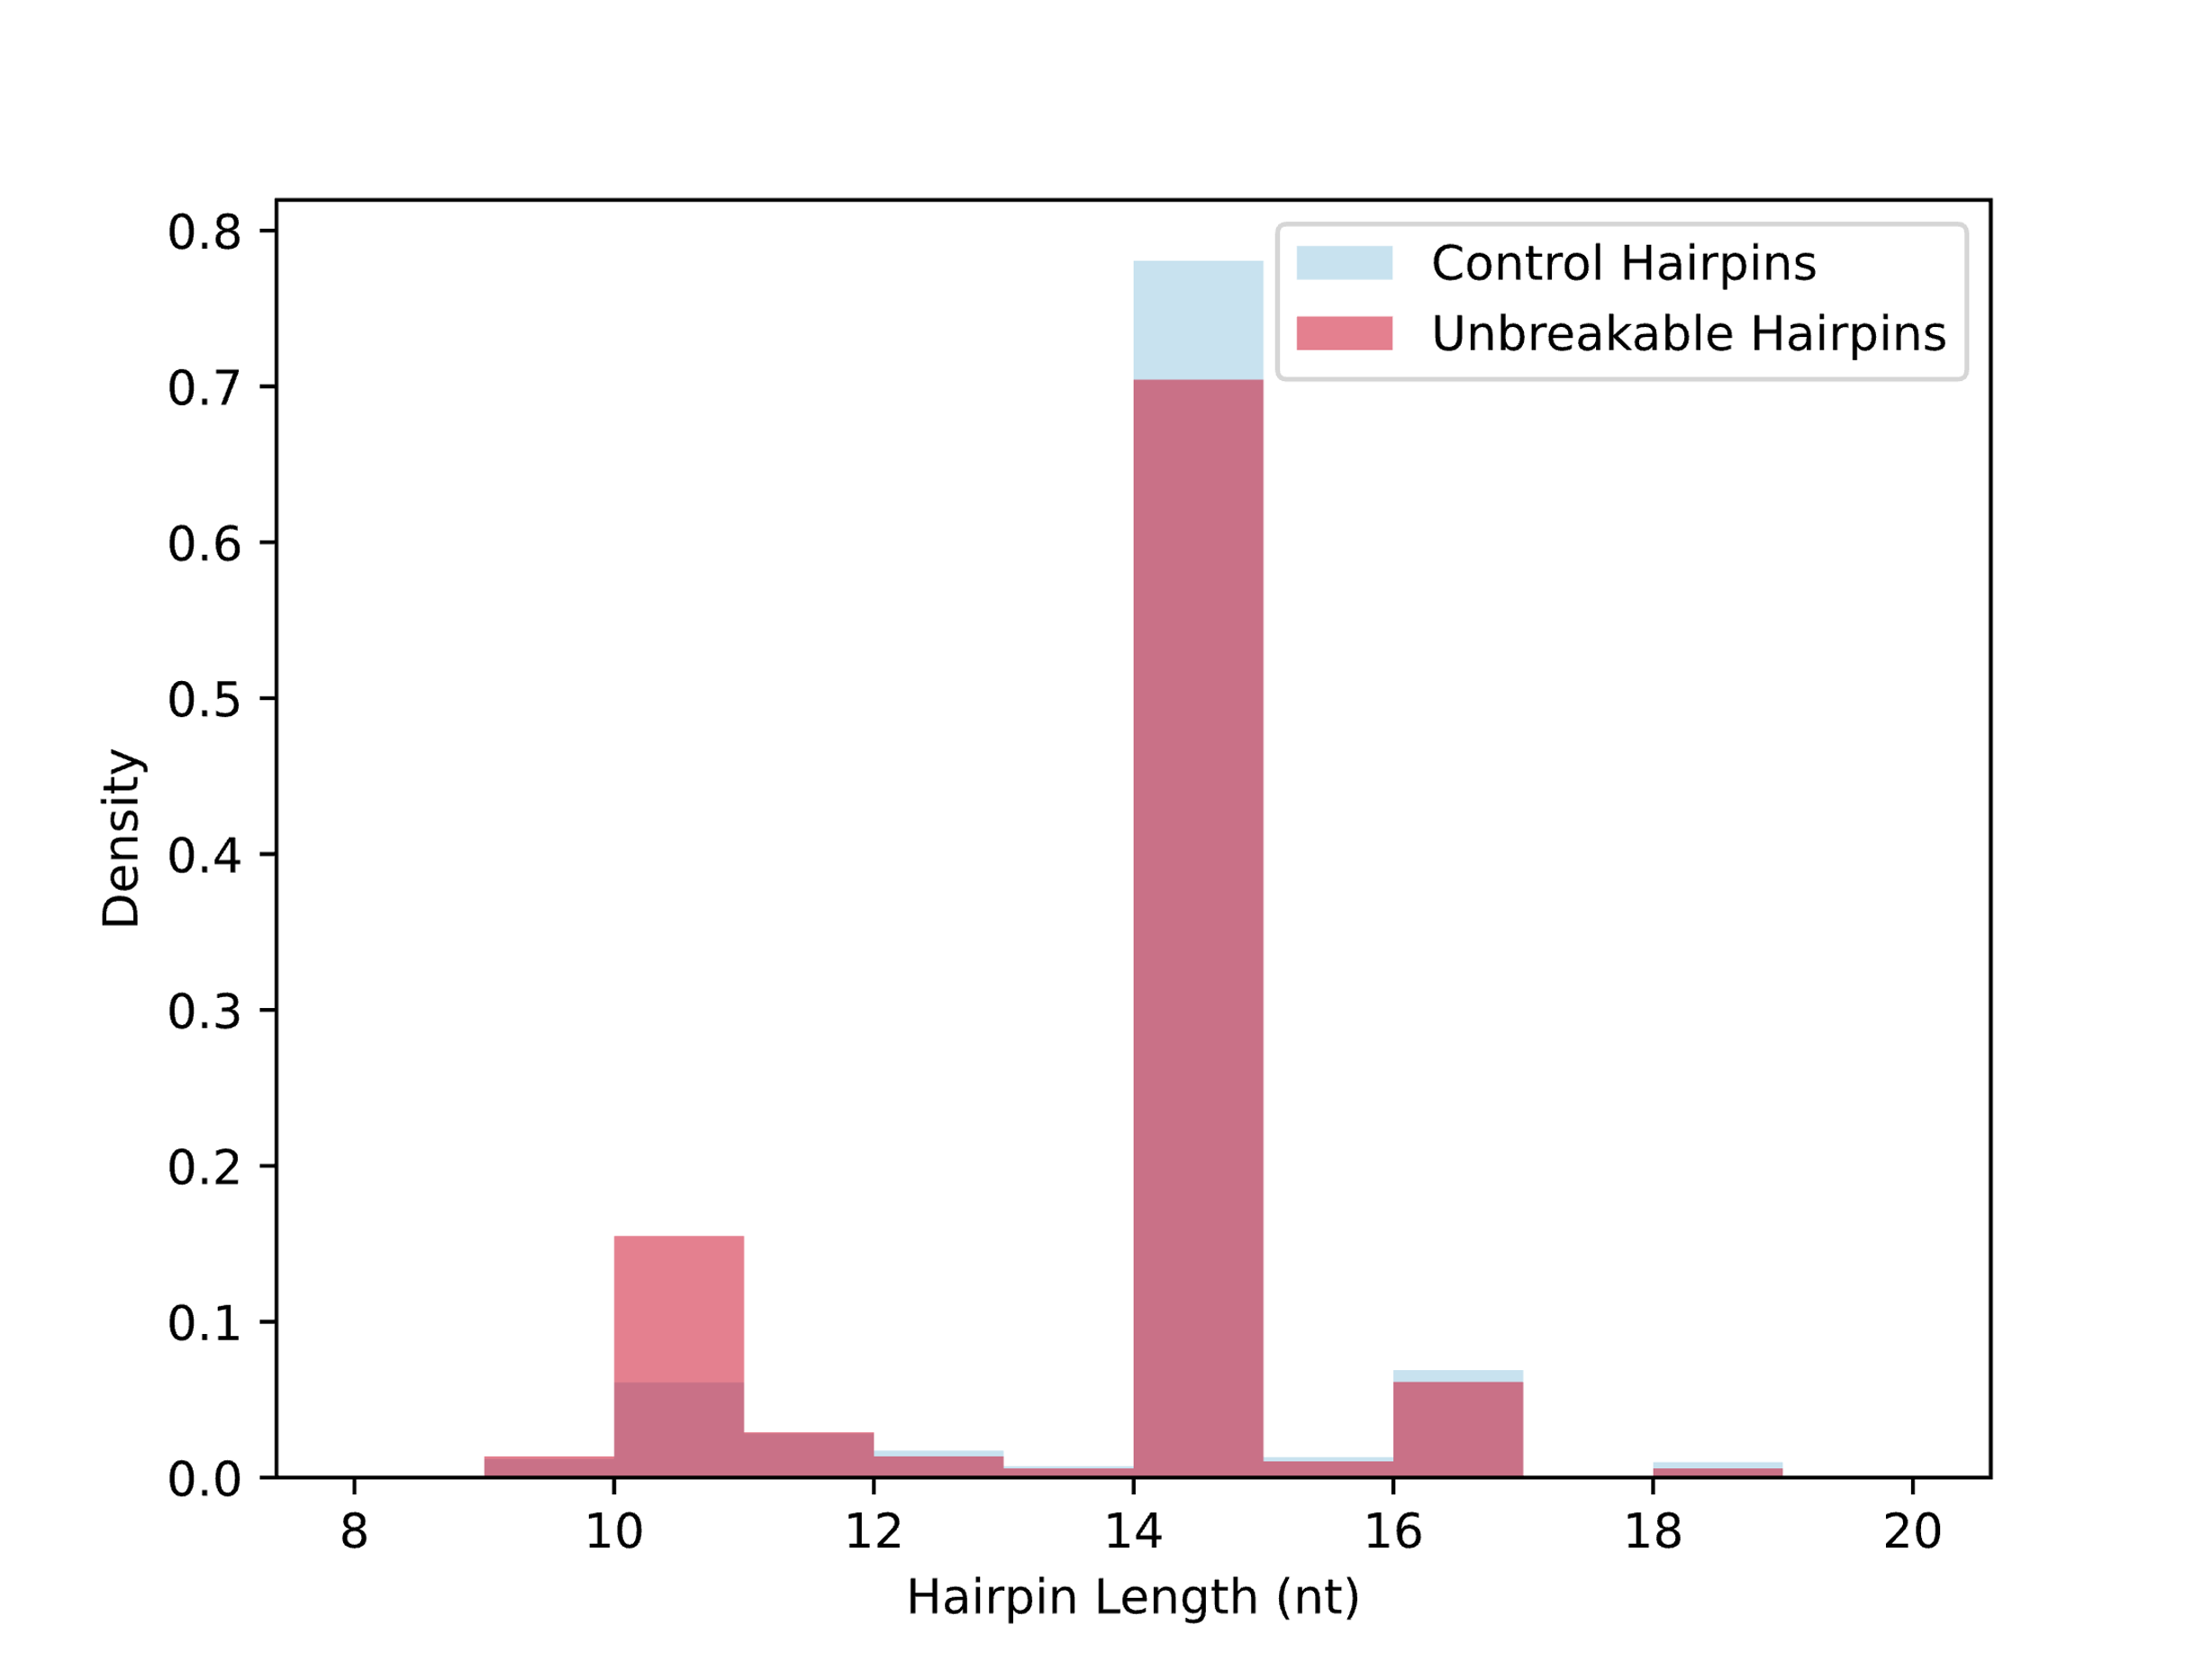


Supplementary Figure 8: Unbreakable hairpins and the length-matched representative sample of breakable hairpins share a similar length distribution.
